# Supplementary material for: Thermoelectric Properties of N-Type Poly (Ether Ether Ketone)/Carbon Nanofiber Melt-Processed Composites
Source: MDPI journal article supplement (doi:10.3390/polym14224803), 2022-11-08
Supplement: s1 [file s1]

## Supporting Information

# Thermoelectric Properties of N-Type Poly (Ether Ether Ketone)/Carbon Nanofiber Melt-Processed Composites

Antonio Jose Paleo <sup>1,\*</sup>, Beate Krause <sup>2</sup>, Delfim Soares <sup>3</sup>, Manuel Melle-Franco <sup>4</sup>, Enrique Muñoz <sup>5</sup>, Petra Pötschke <sup>2</sup> and Ana Maria Rocha <sup>1</sup>

<sup>1</sup> 2C2T-Centre for Textile Science and Technology, Campus Azurem, University of Minho, 4800-058 Guimarães, Portugal

<sup>2</sup> Leibniz-Institut für Polymerforschung Dresden e.V. (IPF), Hohe Str. 6, 01069 Dresden, Germany

<sup>3</sup> CMEMS Research Center, Campus Azurem, University of Minho, 4800-058 Guimarães, Portugal

<sup>4</sup> CICECO—Aveiro Institute of Materials, Department of Chemistry, University of Aveiro, 3810-193 Aveiro, Portugal

<sup>5</sup> Facultad de Física, Pontificia Universidad Católica de Chile, Santiago 7820436, Chile

\* Correspondence: ajpaleovieito@2c2t.uminho.pt

**Table S1.** Thermoelectric properties of carbon nanotube and carbon nanofiber powders and their melt-processed PEEK composites.

| Sample                                     | Filler content | Conduc-<br>tivity | Seebeck<br>Coefficient | Power<br>Factor                                   | Reference |
|--------------------------------------------|----------------|-------------------|------------------------|---------------------------------------------------|-----------|
|                                            | wt. %          | S m <sup>-1</sup> | μV K <sup>-1</sup>     | μW·m <sup>-1</sup> ·K <sup>-2</sup>               |           |
| SWCNT Tuball™                              | 100 (powder)   | 1790              | 39.6                   | 2.8                                               | 1         |
| MWCNT Nanocyl™<br>NC7000                   | 100 (powder)   | 417               | 6.3                    | 1.6 × 10 <sup>-2</sup>                            | 1         |
| MWCNT CNS-PEG                              | 100 (powder)   | 933               | 10.1                   | 9.5 × 10 <sup>-2</sup>                            | 1         |
| CNF Pyrograf® III<br>PR 24 LHT XT          | 100 (powder)   | 133.5             | -5.3                   | 3.7 × 10 <sup>-3</sup>                            | This work |
| CNF Pyrograf® III<br>PR 19 LHT XT          | 100 (powder)   | 136.4             | -5.1                   | 3.5 × 10 <sup>-3</sup>                            | 3         |
| PEEK-Tuball                                | 0.5 -1.25      | 1.8-7.2           | 48.0 -61.3             | 6.6 × 10 <sup>-3</sup> -2.0<br>× 10 <sup>-2</sup> | 2         |
| PEEK-Nanocyl®<br>NC7000                    | 3; 5           | 5.2; 51.7         | 7.3; 6.8               | 2.7 × 10 <sup>-4</sup> 2.3<br>× 10 <sup>-3</sup>  | 2         |
| PEEK- Nanocyl™<br>NC 7000                  | 3; 4           | 1.1; 12.4         | 9.7; 9.2               | 1.0 × 10 <sup>-4</sup><br>1.0 × 10 <sup>-3</sup>  | 4         |
| PEEK-CNS-PEG                               | 0.5 – 3        | 8.8-97.1          | 13.4-16.1              | 1.8 × 10 <sup>-3</sup> 2.1<br>× 10 <sup>-2</sup>  | 2         |
| PEEK- CNF<br>Pyrograf® III PR 24<br>LHT XT | 10             | 27.5              | -3.4                   | 3.1 × 10 <sup>-4</sup>                            | This work |

## References:

1. Beate Krause, Carine Barbier, Juhasz Levente, Maxim Klaus, Petra Pötschke, Screening of different carbon nanotubes in melt-mixed polymer composites with different polymer matrices for their thermoelectrical properties, *Journal of Composites Science* 2019, 3(4), 106; doi:10.3390/jcs3040106
2. Ioannis Konidakis, Beate Krause, Gyu-Hyeon Park, Nithin Pulumati, Heiko Reith, Petra Pötschke, Emmanuel Stratakis, Probing the carrier dynamics of polymer composites with single and hybrid carbon nanotube fillers for improved thermoelectric performance, *ACS Applied Energy Materials* 2022, 5, 9770–9781, doi:10.1021/acsaem.2c01449.

3. A.J. Paleo, B. Krause, M.F. Cerqueira, E. Muñoz, P. Pötschke, A.M. Rocha, Nonlinear Thermopower Behaviour of N-Type Carbon Nanofibres and Their Melt Mixed Polypropylene Composites, *Polymers*, 14 (2022). Doi:10.3390/polym14020269.
4. Gonçalves, Jordana; Lima, Patrícia; Krause, Beate; Pötschke, Petra; Lafont, Ugo; Gomes, José ; Abreu, Cristiano ; Paiva, Maria ; Covas, José, Electrically Conductive Polyetheretherketone Nanocomposite Filaments: From Production to Fused Deposition Modeling, *Polymers* 2018, 10 (8), 925, <https://doi.org/10.3390/polym10080925>
